# Supplementary material
Source: PubMed Central journal article supplement (PMC3066051)
Supplement: NIHMS278498-supplement-supp1.pdf [file NIHMS278498-supplement-supp1.pdf]

## Supplementary Appendix

This appendix has been provided by the authors to give readers additional information about their work.

Supplement to: Berrington de Gonzalez A, Hartge P, Cerhan JR, et al. Body-mass index and mortality among 1.46 million white adults. *N Engl J Med* 2010;363:2211-9.

## **Funding for each study**

The NIH-AARP Diet and Health study was supported by the Intramural Research Program of the National Cancer Institute, National Institutes of Health.

The Adventist Health Study-1 was supported by grant #: R01-CA14703 from the National Cancer Institute and by grant #: R01- HL26210 from the National Heart, Lung and Blood Institute.

The Agricultural Health Study was funded by the Intramural Program of the NIH, National Cancer Institute (Z01 P010119) and the National Institute of Environmental Health Sciences (Z01 ES 049030-11)

The BCDDP Follow-up Study has been supported by the Intramural Research Program of the National Cancer Institute, National Institutes of Health.

The CTS was supported by National Cancer Institute grant #CA 77398

This research was made possible in part through funding from the National Institute of Aging (grant No. 5U01AG018033) and National Cancer Institute (grant R01 CA105069).

CLUE was supported by the National Institute of Aging; Grant number: U01 AG18033 and National Cancer Institute (NCI): Grant number: CA105069.

The Cohort of Swedish Men was supported by the Swedish Research Council, the Swedish Council for Working Life and Social Research and the Swedish Cancer Foundation.

The Health Professionals Follow-up Study is supported by NIH/NCI P01 CA055075, Prospective Studies of Diet and Cancer in Men and Women.

The Iowa Women's Health Study is supported by a grant from the National Cancer Institute (R01 CA39742).

The Melbourne Collaborative Cohort Study (MCCS) receives core funding from The Cancer Council Victoria and is additionally supported by grants from the Australian NHMRC (209057, 251533, 396414, and 504715).

The Nurses' Health Study is supported by NIH/NCI P01 CA087969, Dietary and Hormonal Determinants of Cancer in Women.

The NYU Women's Health Study is supported by grant R01 CA 098661 and Center grant CA 016087 from the National Cancer Institute and by Center grant ES 000260 from the National Institute of Environmental Health Sciences.

The Physicians' Health Study was supported by grants CA 97193, CA 34944, CA 40360, HL 26490, and HL 34595 from the National Institutes of Health.

We thank Drs. Christine Berg and Philip Prorok (Division of Cancer Prevention, National Cancer Institute), the Screening Center investigators and staff of the PLCO Cancer Screening Trial, Tom Riley and staff (Information Management Services, Inc.), Barbara O'Brien and staff (Westat, Inc.), and Jackie King (Bioreliance, Rockville) for their contributions to making this study possible.

The Swedish Mammography Cohort was supported by the Swedish Research Council, Swedish Council for Working Life and Social Research and the Swedish Cancer Foundation.

The USRT was supported by the Intramural Research Program of the National Cancer Institute, National Institutes of Health.

The VITamin And Lifestyle (VITAL) study was supported by National Institutes of Health grant R01 CA74846 and a grant from the Washington State Vitamins Distribution Agreement.

The WHS was supported by CA047988, HL043851, HL080467

The Women's Lifestyle and Health project was supported by the Swedish Cancer Society and the Swedish Research Council.

Table 1: Selected characteristics for each prospective study

| Study <sup>ref</sup>                                                                   | Females       | Males         | Study entry    | Follow-up Median (max) | Age at entry Median (range) | BMI (kg/m <sup>2</sup> ) Mean (SD) | % ever smokers | % C-M      | Deaths        |
|----------------------------------------------------------------------------------------|---------------|---------------|----------------|------------------------|-----------------------------|------------------------------------|----------------|------------|---------------|
| NIH-AARP Diet and Health Study (AARP) <sup>7,20</sup>                                  | 194960        | 306224        | 1995-97        | 10 (11) yrs            | 62 (50-71) yrs              | 27.0 (4.6)                         | 64%            | 22%        | 58472         |
| Adventist Health Study 1 (AHS-1) <sup>21</sup>                                         | 17693         | 12249         | 1976-80        | 12 (22) yrs            | 53 (25-83) yrs              | 24.6 (4.2)                         | 25%            | 10%        | 3846          |
| Agricultural Health Study (AHS) <sup>22</sup>                                          | 27888         | 38215         | 1993-97        | 10 (14) yrs            | 46 (19-83) yrs              | 26.9 (4.4)                         | 39%            | 8%         | 3274          |
| Breast Cancer Detection Demonstration Project Follow-up Study (BCDDP) <sup>23,24</sup> | 41076         | 0             | 1987-89        | 17 (19) yrs            | 61 (40-83) yrs              | 25.0 (4.4)                         | 45%            | 26%        | 7587          |
| California Teachers Study (CTS) <sup>25</sup>                                          | 107846        | 0             | 1995-96        | 9 (9) yrs              | 52 (22-83) yrs              | 24.8 (4.9)                         | 35%            | 27%        | 5027          |
| CLUE I & II (CLUE) <sup>26</sup>                                                       | 12413         | 8863          | 1989           | 14 (19) yrs            | 52 (19-83) yrs              | 26.2 (4.7)                         | 47%            | 5%         | 4506          |
| Cohort of Swedish Men (COSM) <sup>27</sup>                                             | 0             | 43125         | 1998           | 10 (10) yrs            | 59 (45-79) yrs              | 25.8 (3.3)                         | 64%            | 38%        | 6004          |
| Health Professionals Follow-up Study (HPFS) <sup>10</sup>                              | 0             | 45382         | 1986-87        | 17 (23) yrs            | 54 (39-78) yrs              | 25.5 (3.2)                         | 54%            | 34%        | 10542         |
| Iowa Women's Health Study (IWHS) <sup>28</sup>                                         | 40623         | 0             | 1986           | 19 (19) yrs            | 62 (52-71) yrs              | 26.1 (4.8)                         | 35%            | 17%        | 11565         |
| Melbourne Collaborative Cohort Study (MCCS) <sup>18</sup>                              | 24396         | 16956         | 1990-94        | 15 (18) yrs            | 56 (28-81) yrs              | 26.9 (4.4)                         | 43%            | 8%         | 4765          |
| Nurses' Health Study (NHS) <sup>11,12</sup>                                            | 90975         | 0             | 1976-78        | 26 (28) yrs            | 43 (29-56) yrs              | 24.4 (4.4)                         | 57%            | 12%        | 16597         |
| NYU Women's Health Study (NYUWHS) <sup>29</sup>                                        | 9683          | 0             | 1985-91        | 19 (20) yrs            | 52 (31-70) yrs              | 24.6 (4.4)                         | 56%            | 8%         | 1038          |
| Physicians' Health Study I & II (PHS) <sup>13</sup>                                    | 0             | 24381         | 1981-00        | 22 (26) yrs            | 53 (39-83) yrs              | 25.2 (3.0)                         | 46%            | 6%         | 3014          |
| Prostate, Lung, Colorectal and Ovarian Cancer Screening Trial (PLCO) <sup>30-32</sup>  | 66278         | 63756         | 1993-01        | 9 (13) yrs             | 62 (50-78) yrs              | 27.3 (4.7)                         | 54%            | 13%        | 12783         |
| Swedish Mammography Cohort (SMC) <sup>33</sup>                                         | 36198         | 0             | 1998           | 10 (10) yrs            | 60 (48-83) yrs              | 25.1 (3.9)                         | 46%            | 35%        | 3176          |
| US Radiologic Technicians Cohort (USRT) <sup>34</sup>                                  | 64213         | 18197         | 1994-98        | 6 (7) yrs              | 46 (31-83) yrs              | 25.6 (4.9)                         | 47%            | 9%         | 1450          |
| VITamins and Lifestyle (VITAL) Study <sup>35</sup>                                     | 34386         | 33163         | 2000-02        | 6 (7) yrs              | 61 (50-76) yrs              | 27.4 (5.0)                         | 53%            | 22%        | 3453          |
| Women's Health Study (WHS) <sup>36-38</sup>                                            | 36654         | 0             | 1993-96        | 13 (15) yrs            | 52 (38-83) yrs              | 26.0 (5.0)                         | 50%            | 1%         | 1908          |
| Women's Lifestyle and Health Study (WLHS) <sup>39</sup>                                | 47165         | 0             | 1991-92        | 15 (15) yrs            | 40 (30-50) yrs              | 23.5 (3.6)                         | 59%            | 10%        | 1080          |
| <b>Total</b>                                                                           | <b>852447</b> | <b>610511</b> | <b>1976-02</b> | <b>10 (28) yrs</b>     | <b>58 (19-83) yrs</b>       | <b>26.2 (4.7)</b>                  | <b>53%</b>     | <b>19%</b> | <b>160087</b> |

\*C-M: co-morbidities (cancer and heart disease). Information on heart disease was not collected in CLUE II or MCCS.

Table 2: Prevalence of potential confounders by BMI category

|                     |                        | BMI (kg/m <sup>2</sup> ) |           |         |           |         |           |         |         |         |      |
|---------------------|------------------------|--------------------------|-----------|---------|-----------|---------|-----------|---------|---------|---------|------|
|                     |                        | 15-18.4                  | 18.5-19.9 | 20-22.4 | 22.5-24.9 | 25-27.4 | 27.5-29.9 | 30-34.9 | 35-39.9 | 40-49.9 | All  |
| Male participants   | Median BMI             | 17.6                     | 19.5      | 21.7    | 23.8      | 26.2    | 28.7      | 31.6    | 36.6    | 42.3    |      |
| Female participants | Median BMI             | 17.9                     | 19.4      | 21.3    | 23.6      | 26.1    | 28.6      | 31.9    | 36.9    | 42.6    |      |
| Male participants   | All                    | 0.5%                     | 1%        | 8%      | 23%       | 30%     | 19%       | 15%     | 3%      | 1%      | 100% |
|                     | Healthy never-smokers* | 0.4%                     | 1%        | 10%     | 26%       | 30%     | 17%       | 13%     | 3%      | 1%      | 100% |
| Female participants | All                    | 2%                       | 6%        | 22%     | 25%       | 19%     | 11%       | 11%     | 4%      | 2%      | 100% |
|                     | Healthy never-smokers* | 2%                       | 6%        | 22%     | 24%       | 18%     | 11%       | 12%     | 4%      | 2%      | 100% |
| Smoking status      | Never                  | 48%                      | 51%       | 51%     | 48%       | 45%     | 44%       | 45%     | 47%     | 48%     | 47%  |
|                     | Former                 | 27%                      | 28%       | 32%     | 38%       | 43%     | 45%       | 45%     | 44%     | 44%     | 40%  |
|                     | Current                | 25%                      | 20%       | 17%     | 14%       | 12%     | 11%       | 10%     | 9%      | 8%      | 13%  |
| Co-morbidities      | Cancer                 | 10%                      | 8%        | 8%      | 8%        | 8%      | 8%        | 8%      | 8%      | 9%      | 8%   |
|                     | Heart disease          | 11%                      | 8%        | 10%     | 13%       | 15%     | 17%       | 17%     | 17%     | 17%     | 14%  |
|                     | Emphysema              | 5%                       | 3%        | 2%      | 2%        | 2%      | 2%        | 2%      | 3%      | 3%      | 2%   |
|                     | Stroke                 | 2%                       | 1%        | 1%      | 2%        | 2%      | 2%        | 2%      | 2%      | 2%      | 2%   |
| Alcohol             | 0 g/day                | 36%                      | 30%       | 27%     | 26%       | 26%     | 28%       | 32%     | 38%     | 44%     | 28%  |
|                     | >0 g/day               | 64%                      | 70%       | 73%     | 74%       | 74%     | 72%       | 68%     | 62%     | 56%     | 72%  |
| Physical activity   | Low                    | 35%                      | 30%       | 28%     | 29%       | 31%     | 35%       | 41%     | 50%     | 58%     | 33%  |
|                     | Medium                 | 29%                      | 31%       | 31%     | 30%       | 29%     | 29%       | 28%     | 26%     | 23%     | 29%  |
|                     | High                   | 37%                      | 39%       | 40%     | 41%       | 40%     | 36%       | 31%     | 24%     | 19%     | 38%  |
| Education           | High school            | 25%                      | 22%       | 23%     | 27%       | 30%     | 32%       | 33%     | 33%     | 32%     | 28%  |
|                     | Some college           | 23%                      | 22%       | 23%     | 23%       | 26%     | 27%       | 30%     | 31%     | 33%     | 25%  |
|                     | College+               | 53%                      | 57%       | 54%     | 50%       | 45%     | 41%       | 37%     | 36%     | 35%     | 46%  |
| Marital status      | Married                | 67%                      | 72%       | 76%     | 78%       | 80%     | 80%       | 77%     | 71%     | 64%     | 78%  |
|                     | Not married            | 33%                      | 28%       | 25%     | 22%       | 20%     | 20%       | 23%     | 29%     | 36%     | 22%  |

\*No cancer or heart disease at baseline

Table 3: Estimated hazard ratios<sup>†</sup> (and 95% CI) for death from any cause according to BMI category: impact of excluding smokers and those with co-morbidities\*

a) Female participants

|               |                          | BMI (kg/m <sup>2</sup> ) |             |              |           |             |             |             |             |             |
|---------------|--------------------------|--------------------------|-------------|--------------|-----------|-------------|-------------|-------------|-------------|-------------|
|               |                          | 15-18.4                  | 18.5-19.9   | 20-22.4      | 22.5-24.9 | 25-27.4     | 27.5-29.9   | 30-34.9     | 35-39.9     | 40-49.9     |
| No. of deaths | All                      | 2345                     | 4541        | 15099        | 17576     | 14499       | 9196        | 10489       | 4060        | 2010        |
| ASR           |                          | 734                      | 486         | 389          | 362       | 376         | 408         | 463         | 581         | 785         |
| Adjusted HR   |                          | 2.02                     | 1.34        | 1.06         | 1.00      | 1.03        | 1.11        | 1.25        | 1.59        | 1.99        |
| 95% CI        |                          | [1.94-2.11]              | [1.30-1.38] | [[1.04-1.09] | -         | [1.01-1.06] | [1.08-1.14] | [1.22-1.28] | [1.53-1.64] | [1.90-2.09] |
| No. of deaths | Never and former-smokers | 1268                     | 2654        | 9783         | 12257     | 10838       | 7127        | 8462        | 3387        | 1736        |
| ASR           |                          | 558                      | 372         | 316          | 302       | 327         | 359         | 419         | 543         | 756         |
| Adjusted HR   |                          | 1.81                     | 1.23        | 1.04         | 1.00      | 1.07        | 1.16        | 1.35        | 1.75        | 2.28        |
| 95% CI        |                          | [1.71-1.91]              | [1.18-1.29] | [1.01-1.06]  | -         | [1.04-1.10] | [1.13-1.20] | [1.31-1.38] | [1.68-1.82] | [2.17-2.40] |
| No. of deaths | Never-smokers            | 699                      | 1471        | 5487         | 7129      | 6417        | 4220        | 4985        | 1932        | 913         |
| ASR           |                          | 471                      | 324         | 284          | 276       | 306         | 326         | 389         | 507         | 686         |
| Adjusted HR   |                          | 1.60                     | 1.16        | 1.00         | 1.00      | 1.09        | 1.17        | 1.39        | 1.83        | 2.39        |
| 95% CI        |                          | [1.48-1.73]              | [1.09-1.22] | [0.97-1.04]  | -         | [1.05-1.13] | [1.13-1.22] | [1.34-1.44] | [1.74-1.93] | [2.23-2.57] |
| No. of deaths | Healthy never-smokers    | 426                      | 1016        | 3877         | 5044      | 4474        | 2933        | 3515        | 1323        | 623         |
| ASR           |                          | 368                      | 278         | 249          | 239       | 264         | 281         | 347         | 450         | 610         |
| Adjusted HR   |                          | 1.47                     | 1.14        | 1.00         | 1.00      | 1.09        | 1.19        | 1.44        | 1.88        | 2.51        |
| 95% CI        |                          | [1.33-1.62]              | [1.07-1.22] | [0.96-1.04]  | -         | [1.05-1.14] | [1.14-1.24] | [1.38-1.50] | [1.77-2.00] | [2.30-2.73] |

b) Male participants

|               |                          | BMI (kg/m <sup>2</sup> ) |             |             |           |             |             |             |             |             |
|---------------|--------------------------|--------------------------|-------------|-------------|-----------|-------------|-------------|-------------|-------------|-------------|
|               |                          | 15-18.4                  | 18.5-19.9   | 20-22.4     | 22.5-24.9 | 25-27.4     | 27.5-29.9   | 30-34.9     | 35-39.9     | 40-49.9     |
| No. of deaths | All                      | 700                      | 1245        | 7425        | 17714     | 22497       | 14239       | 12382       | 3039        | 1031        |
| ASR           |                          | 1273.95                  | 833.47      | 610.2       | 510.99    | 540.95      | 569.3       | 670.57      | 857.39      | 1127.67     |
| Adjusted HR   |                          | 1.98                     | 1.60        | 1.18        | 1.00      | 0.97        | 1.03        | 1.16        | 1.44        | 1.93        |
| 95% CI        |                          | [1.83-2.13]              | [1.51-1.69] | [1.15-1.21] | -         | [0.95-0.99] | [1.01-1.06] | [1.13-1.19] | [1.39-1.50] | [1.81-2.06] |
| No. of deaths | Never and former-smokers | 427                      | 761         | 5187        | 13454     | 17978       | 11604       | 10158       | 2559        | 880         |
| ASR           |                          | 1025.02                  | 662.17      | 504.29      | 439.35    | 474.89      | 519.11      | 621.70      | 811.99      | 1062.31     |
| Adjusted HR   |                          | 1.77                     | 1.48        | 1.12        | 1.00      | 1.01        | 1.10        | 1.25        | 1.60        | 2.20        |
| 95% CI        |                          | [1.61-1.95]              | [1.37-1.59] | [1.09-1.16] | -         | [0.99-1.03] | [1.07-1.13] | [1.22-1.28] | [1.54-1.68] | [2.05-2.36] |
| No. of deaths | Never-smokers            | 124                      | 236         | 1869        | 4632      | 5528        | 3241        | 2734        | 673         | 247         |
| ASR           |                          | 769.84                   | 413.82      | 401.12      | 360.28    | 388.73      | 428.51      | 534.08      | 692.74      | 1015.36     |
| Adjusted HR   |                          | 1.42                     | 1.11        | 1.04        | 1.00      | 1.04        | 1.17        | 1.43        | 1.95        | 2.86        |
| 95% CI        |                          | [1.18-1.69]              | [0.97-1.26] | [0.99-1.10] | -         | [1.00-1.08] | [1.12-1.23] | [1.36-1.50] | [1.79-2.12] | [2.51-3.25] |
| No. of deaths | Healthy never-smokers    | 78                       | 136         | 1160        | 2941      | 3509        | 2040        | 1692        | 424         | 158         |
| ASR           |                          | 637.84                   | 316.06      | 324.75      | 299.68    | 327.2       | 369.35      | 437.02      | 570.48      | 881.76      |
| Adjusted HR   |                          | 1.37                     | 1.01        | 1.00        | 1.00      | 1.06        | 1.21        | 1.44        | 2.06        | 2.93        |
| 95% CI        |                          | [1.09-1.71]              | [0.85-1.20] | [0.93-1.07] | -         | [1.01-1.12] | [1.14-1.28] | [1.35-1.53] | [1.85-2.28] | [2.49-3.45] |

†Hazard ratio calculated with age as the underlying time scale, stratified by study and adjusted for alcohol (g/day), education, marital status and overall physical activity. \*No cancer or heart disease at baseline. ASR/100,000- age-standardized rate, standardized using the US general population.



Table 4: Estimated hazard ratios<sup>†</sup> (and 95% CI) for death from any cause according to BMI category: impact of excluding additional co-morbidities in never smokers\*

a) Female participants

| Co-morbidity exclusion |                                      | BMI (kg/m <sup>2</sup> ) |             |             |                  |             |             |             |             |             |
|------------------------|--------------------------------------|--------------------------|-------------|-------------|------------------|-------------|-------------|-------------|-------------|-------------|
|                        |                                      | 15-18.4                  | 18.5-19.9   | 20-22.4     | <u>22.5-24.9</u> | 25-27.4     | 27.5-29.9   | 30-34.9     | 35-39.9     | 40-49.9     |
| Adjusted HR            | None                                 | 1.67                     | 1.22        | 1.04        | 1.00             | 1.09        | 1.13        | 1.29        | 1.62        | 2.1         |
| 95% CI                 |                                      | [1.48-1.88]              | [1.12-1.33] | [0.99-1.10] | -                | [1.03-1.15] | [1.07-1.20] | [1.22-1.36] | [1.50-1.75] | [1.90-2.32] |
| Adjusted HR            | Excluding cancer                     | 1.63                     | 1.24        | 1.06        | 1.00             | 1.08        | 1.14        | 1.33        | 1.68        | 2.28        |
| 95% CI                 |                                      | [1.42-1.87]              | [1.13-1.37] | [1.00-1.13] | -                | [1.02-1.15] | [1.07-1.22] | [1.25-1.42] | [1.54-1.84] | [2.04-2.54] |
| Adjusted HR            | Additionally excluding heart disease | 1.57                     | 1.27        | 1.06        | 1.00             | 1.10        | 1.19        | 1.36        | 1.67        | 2.16        |
| 95% CI                 |                                      | [1.34-1.85]              | [1.14-1.42] | [0.99-1.14] | -                | [1.03-1.18] | [1.10-1.28] | [1.26-1.46] | [1.51-1.84] | [1.90-2.46] |
| Adjusted HR            | Additionally excluding emphysema     | 1.56                     | 1.26        | 1.06        | 1.00             | 1.10        | 1.19        | 1.36        | 1.67        | 2.14        |
| 95% CI                 |                                      | [1.32-1.84]              | [1.13-1.41] | [0.98-1.13] | -                | [1.03-1.17] | [1.10-1.28] | [1.26-1.46] | [1.51-1.84] | [1.88-2.44] |
| Adjusted HR            | Additionally excluding stroke        | 1.56                     | 1.24        | 1.05        | 1.00             | 1.10        | 1.18        | 1.35        | 1.67        | 2.14        |
| 95% CI                 |                                      | [1.32-1.84]              | [1.11-1.39] | [0.98-1.13] | -                | [1.02-1.17] | [1.09-1.27] | [1.26-1.46] | [1.50-1.85] | [1.87-2.44] |

b) Male participants

| Co-morbidity exclusion |                                      | BMI (kg/m <sup>2</sup> ) |             |             |           |             |             |             |             |             |
|------------------------|--------------------------------------|--------------------------|-------------|-------------|-----------|-------------|-------------|-------------|-------------|-------------|
|                        |                                      | 15-18.4                  | 18.5-19.9   | 20-22.4     | 22.5-24.9 | 25-27.4     | 27.5-29.9   | 30-34.9     | 35-39.9     | 40-49.9     |
| Adjusted HR            | None                                 | 1.51                     | 1.17        | 1.06        | 1.00      | 1.02        | 1.16        | 1.38        | 1.83        | 2.83        |
| 95% CI                 |                                      | [1.23-1.87]              | [0.99-1.37] | [0.99-1.13] | -         | [0.97-1.07] | [1.10-1.22] | [1.31-1.46] | [1.67-2.01] | [2.46-3.25] |
| Adjusted HR            | Excluding cancer                     | 1.60                     | 1.16        | 1.04        | 1.00      | 1.04        | 1.20        | 1.43        | 1.94        | 3.01        |
| 95% CI                 |                                      | [1.28-1.99]              | [0.97-1.37] | [0.97-1.12] | -         | [0.99-1.09] | [1.13-1.27] | [1.34-1.51] | [1.76-2.14] | [2.60-3.49] |
| Adjusted HR            | Additionally excluding heart disease | 1.61                     | 1.00        | 1.01        | 1.00      | 1.06        | 1.23        | 1.44        | 1.96        | 2.91        |
| 95% CI                 |                                      | [1.23-2.11]              | [0.80-1.25] | [0.93-1.10] | -         | [1.00-1.13] | [1.15-1.31] | [1.34-1.55] | [1.75-2.20] | [2.44-3.47] |
| Adjusted HR            | Additionally excluding emphysema     | 1.60                     | 0.98        | 1.01        | 1.00      | 1.06        | 1.23        | 1.45        | 1.97        | 2.93        |
| 95% CI                 |                                      | [1.22-2.10]              | [0.78-1.23] | [0.93-1.10] | -         | [1.00-1.13] | [1.15-1.32] | [1.35-1.57] | [1.75-2.21] | [2.45-3.49] |
| Adjusted HR            | Additionally excluding stroke        | 1.57                     | 0.98        | 1.01        | 1.00      | 1.06        | 1.24        | 1.45        | 1.96        | 2.95        |
| 95% CI                 |                                      | [1.19-2.08]              | [0.77-1.23] | [0.92-1.10] | -         | [1.00-1.13] | [1.15-1.33] | [1.35-1.56] | [1.74-2.21] | [2.47-3.53] |

†Hazard ratio calculated with age as the underlying time scale, stratified by study and adjusted for alcohol (g/day), education, marital status and overall physical activity. \*Analyses were restricted to the 9 cohorts including females and 7 cohorts including males that had all four co-morbidity variables.

Table 5: Estimated hazard ratios<sup>†</sup>(and 95% CI) for death from any cause according to BMI category: impact of adjustment for potential confounding variables in healthy never smokers\*

a)Female participants

| Adjustment factor         | BMI (kg/m <sup>2</sup> ) |                     |                     |                     |           |                     |                     |                     |                     |                     |
|---------------------------|--------------------------|---------------------|---------------------|---------------------|-----------|---------------------|---------------------|---------------------|---------------------|---------------------|
|                           | 15-18.4                  | 18.5-19.9           | 20-22.4             | 22.5-24.9           | 25-27.4   | 27.5-29.9           | 30-34.9             | 35-39.9             | 40-49.9             |                     |
| Unadjusted HR<br>[95% CI] | -                        | 1.49<br>[1.35-1.65] | 1.15<br>[1.07-1.23] | 0.99<br>[0.95-1.04] | 1.00<br>- | 1.11<br>[1.06-1.15] | 1.22<br>[1.17-1.28] | 1.51<br>[1.44-1.57] | 2.02<br>[1.90-2.15] | 2.74<br>[2.52-2.98] |
| Adjusted HR<br>[95% CI]   | Alcohol                  | 1.48<br>[1.34-1.63] | 1.15<br>[1.07-1.23] | 1.00<br>[0.96-1.04] | 1.00<br>- | 1.10<br>[1.05-1.14] | 1.20<br>[1.15-1.26] | 1.47<br>[1.41-1.53] | 1.95<br>[1.84-2.08] | 2.63<br>[2.41-2.86] |
| Adjusted HR<br>[95% CI]   | Education                | 1.50<br>[1.36-1.66] | 1.16<br>[1.08-1.24] | 1.00<br>[0.96-1.04] | 1.00<br>- | 1.10<br>[1.06-1.15] | 1.21<br>[1.16-1.27] | 1.49<br>[1.43-1.56] | 2.00<br>[1.88-2.12] | 2.70<br>[2.48-2.93] |
| Adjusted HR<br>[95% CI]   | Marital status           | 1.48<br>[1.34-1.63] | 1.14<br>[1.07-1.22] | 0.99<br>[0.95-1.04] | 1.00<br>- | 1.11<br>[1.06-1.15] | 1.22<br>[1.17-1.28] | 1.50<br>[1.44-1.57] | 2.01<br>[1.89-2.14] | 2.71<br>[2.49-2.94] |
| Adjusted HR<br>[95% CI]   | Physical activity        | 1.49<br>[1.35-1.65] | 1.15<br>[1.07-1.23] | 1.00<br>[0.95-1.04] | 1.00<br>- | 1.10<br>[1.06-1.15] | 1.21<br>[1.16-1.27] | 1.49<br>[1.42-1.55] | 1.97<br>[1.86-2.10] | 2.65<br>[2.44-2.88] |

b)Male participants

| Adjustment factor         |                   | BMI (kg/m <sup>2</sup> ) |                     |                     |           |                     |                     |                     |                     |                     |
|---------------------------|-------------------|--------------------------|---------------------|---------------------|-----------|---------------------|---------------------|---------------------|---------------------|---------------------|
|                           |                   | 15-18.4                  | 18.5-19.9           | 20-22.4             | 22.5-24.9 | 25-27.4             | 27.5-29.9           | 30-34.9             | 35-39.9             | 40-49.9             |
| Unadjusted HR<br>[95% CI] | -                 | 1.48<br>[1.18-1.85]      | 1.06<br>[0.89-1.26] | 1.01<br>[0.94-1.08] | 1.00<br>- | 1.07<br>[1.02-1.13] | 1.24<br>[1.17-1.31] | 1.52<br>[1.43-1.61] | 2.25<br>[2.03-2.49] | 3.29<br>[2.80-3.87] |
| Adjusted HR<br>[95% CI]   | Alcohol           | 1.44<br>[1.15-1.81]      | 1.04<br>[0.88-1.24] | 1.01<br>[0.94-1.08] | 1.00<br>- | 1.07<br>[1.02-1.12] | 1.23<br>[1.17-1.31] | 1.50<br>[1.41-1.59] | 2.21<br>[2.00-2.45] | 3.21<br>[2.73-3.77] |
| Adjusted HR<br>[95% CI]   | Education         | 1.48<br>[1.18-1.86]      | 1.06<br>[0.89-1.26] | 1.01<br>[0.95-1.09] | 1.00<br>- | 1.07<br>[1.01-1.12] | 1.22<br>[1.16-1.30] | 1.49<br>[1.40-1.58] | 2.18<br>[1.96-2.42] | 3.19<br>[2.71-3.75] |
| Adjusted HR<br>[95% CI]   | Marital status    | 1.41<br>[1.12-1.76]      | 1.03<br>[0.86-1.22] | 1.00<br>[0.93-1.07] | 1.00<br>- | 1.08<br>[1.03-1.13] | 1.25<br>[1.18-1.32] | 1.52<br>[1.43-1.62] | 2.22<br>[2.00-2.46] | 3.22<br>[2.74-3.78] |
| Adjusted HR<br>[95% CI]   | Physical activity | 1.47<br>[1.17-1.84]      | 1.05<br>[0.89-1.25] | 1.01<br>[0.95-1.09] | 1.00<br>- | 1.06<br>[1.01-1.12] | 1.22<br>[1.15-1.29] | 1.47<br>[1.39-1.57] | 2.15<br>[1.94-2.39] | 3.12<br>[2.66-3.67] |

†Hazard ratios calculated with age as the underlying time scale, stratified by study. \*No cancer or heart disease at baseline.

Table 6: Estimated hazard ratios<sup>†</sup> (and 95% CI) for death from any cause according to BMI category in healthy\* never smokers: impact of adjustment for reporting error using external data from NHANES\*\*

|                                              | BMI (kg/m <sup>2</sup> ) |             |             |           |             |             |             |             |             |
|----------------------------------------------|--------------------------|-------------|-------------|-----------|-------------|-------------|-------------|-------------|-------------|
|                                              | 15-18.4                  | 18.5-19.9   | 20-22.4     | 22.5-24.9 | 25-27.4     | 27.5-29.9   | 30-34.9     | 35-39.9     | 40-49.9     |
| <i>Female participants</i>                   |                          |             |             |           |             |             |             |             |             |
| HR                                           | 1.47                     | 1.14        | 1.00        | 1.00      | 1.09        | 1.19        | 1.44        | 1.88        | 2.51        |
| 95% CI                                       | [1.33-1.62]              | [1.07-1.22] | [0.96-1.04] | -         | [1.05-1.14] | [1.14-1.24] | [1.38-1.50] | [1.77-2.00] | [2.30-2.73] |
| HR adjusted for reporting error <sup>‡</sup> | 1.62                     | 1.28        | 0.99        | 1.00      | 1.05        | 1.16        | 1.36        | 1.80        | 2.42        |
| 95% CI                                       | [1.42-1.86]              | [1.18-1.38] | [0.94-1.03] | -         | [1.01-1.09] | [1.11-1.21] | [1.31-1.42] | [1.70-1.91] | [2.24-2.62] |
| <i>Male participants</i>                     |                          |             |             |           |             |             |             |             |             |
| HR                                           | 1.37                     | 1.01        | 1.00        | 1.00      | 1.06        | 1.21        | 1.44        | 2.06        | 2.93        |
| 95% CI                                       | [1.09-1.71]              | [0.85-1.20] | [0.93-1.07] | -         | [1.01-1.12] | [1.14-1.28] | [1.35-1.53] | [1.85-2.28] | [2.49-3.45] |
| HR adjusted for reporting error <sup>‡</sup> | 1.36                     | 1.11        | 0.98        | 1.00      | 1.03        | 1.17        | 1.39        | 1.98        | 2.82        |
| 95% CI                                       | [1.01-1.84]              | [0.90-1.37] | [0.90-1.06] | -         | [0.98-1.08] | [1.10-1.23] | [1.30-1.47] | [1.79-2.19] | [2.41-3.31] |

<sup>†</sup>Hazard ratios calculated with age as the underlying time scale, stratified by study and adjusted for alcohol (g/day), education, marital status and overall physical activity. \*No cancer or heart disease at baseline. \*\* Adjustment equations were estimated using NHANES survey data<sup>17</sup> by sex:  $BMI_{\text{measured}}=0.63+1.01BMI_{\text{self-reported}}+0.0006\text{Age}$  for females and  $BMI_{\text{measured}}=0.29+0.98BMI_{\text{self-reported}}+0.012\text{Age}$  for males.

Table 7: Estimated hazard ratios† (and 95% CI) for death from any cause according to BMI category: by physical activity level (male and female participants combined) in healthy\* never-smokers

| Physical activity       |        | BMI (kg/m <sup>2</sup> ) |                     |                     |           |                     |                     |                     |                     |                     |
|-------------------------|--------|--------------------------|---------------------|---------------------|-----------|---------------------|---------------------|---------------------|---------------------|---------------------|
|                         |        | 15-18.4                  | 18.5-19.9           | 20-22.4             | 22.5-24.9 | 25-27.4             | 27.5-29.9           | 30-34.9             | 35-39.9             | 40-49.9             |
| Adjusted HR<br>[95% CI] | Low    | 1.62<br>[1.38-1.91]      | 1.15<br>[1.02-1.29] | 1.02<br>[0.95-1.09] | 1.00<br>- | 1.06<br>[1.00-1.12] | 1.18<br>[1.10-1.26] | 1.39<br>[1.31-1.48] | 1.76<br>[1.62-1.92] | 2.32<br>[2.07-2.59] |
| Adjusted HR<br>[95% CI] | Medium | 1.33<br>[1.09-1.62]      | 1.07<br>[0.92-1.22] | 0.97<br>[0.90-1.04] | 1.00<br>- | 1.10<br>[1.04-1.18] | 1.19<br>[1.11-1.29] | 1.42<br>[1.32-1.53] | 2.13<br>[1.90-2.37] | 2.69<br>[2.27-3.18] |
| Adjusted HR<br>[95% CI] | High   | 1.22<br>[1.02-1.46]      | 1.06<br>[0.94-1.19] | 0.99<br>[0.93-1.05] | 1.00<br>- | 1.08<br>[1.02-1.15] | 1.25<br>[1.17-1.34] | 1.53<br>[1.42-1.64] | 2.00<br>[1.78-2.26] | 2.65<br>[2.20-3.19] |

†Hazard ratios calculated with age as the underlying time scale, stratified by study and adjusted for gender, alcohol (g/day), education and marital status. \*No cancer or heart disease at baseline. p-trend across the categories of physical activity=0.14 for BMI<25 and 0.02 for BMI≥25 when estimated using a model for continuous BMI.

Table 8: Estimated hazard ratios† (and 95% CI) for death from any cause per 5 unit increase in BMI in healthy\* never-smokers: impact of omitting each study from the analysis

a) Female participants

| Omitted study | BMI 15-<25 kg/m <sup>2</sup> |             | BMI 25-<50 kg/m <sup>2</sup> |             |
|---------------|------------------------------|-------------|------------------------------|-------------|
|               | HR                           | [95% CI]    | HR                           | [95% CI]    |
| AARP          | 0.86                         | [0.81-0.91] | 1.30                         | [1.28-1.33] |
| AHS-1         | 0.84                         | [0.80-0.89] | 1.29                         | [1.26-1.31] |
| AHS           | 0.85                         | [0.81-0.90] | 1.29                         | [1.26-1.31] |
| BCDDP         | 0.85                         | [0.80-0.89] | 1.29                         | [1.26-1.32] |
| CLUE          | 0.85                         | [0.80-0.89] | 1.28                         | [1.25-1.30] |
| CTS           | 0.84                         | [0.81-0.90] | 1.29                         | [1.26-1.31] |
| IWHS          | 0.85                         | [0.80-0.90] | 1.28                         | [1.25-1.30] |
| MCCS          | 0.84                         | [0.80-0.90] | 1.29                         | [1.26-1.32] |
| NHS           | 0.81                         | [0.77-0.86] | 1.28                         | [1.25-1.30] |
| NYUWHS        | 0.84                         | [0.80-0.89] | 1.29                         | [1.26-1.31] |
| PLCO          | 0.85                         | [0.81-0.90] | 1.29                         | [1.26-1.32] |
| SMC           | 0.85                         | [0.80-0.89] | 1.29                         | [1.26-1.31] |
| USRT          | 0.85                         | [0.80-0.90] | 1.29                         | [1.27-1.32] |
| VITAL         | 0.85                         | [0.80-0.90] | 1.29                         | [1.26-1.32] |
| WHS           | 0.85                         | [0.80-0.89] | 1.29                         | [1.27-1.32] |
| WLH           | 0.85                         | [0.80-0.89] | 1.29                         | [1.26-1.31] |
| All studies   | 0.85                         | [0.80-0.89] | 1.28                         | [1.26-1.31] |

b)Male participants

| Omitted study | BMI15-<25 kg/m <sup>2</sup> |             | BMI 25-<50 kg/m <sup>2</sup> |             |
|---------------|-----------------------------|-------------|------------------------------|-------------|
|               | HR                          | [95% CI]    | HR                           | [95% CI]    |
| AARP          | 0.98                        | [0.87-1.11] | 1.39                         | [1.33-1.45] |
| AHS-1         | 0.88                        | [0.79-0.97] | 1.36                         | [1.32-1.40] |
| AHS           | 0.91                        | [0.82-1.01] | 1.36                         | [1.32-1.41] |
| CLUE          | 0.91                        | [0.83-1.01] | 1.35                         | [1.31-1.40] |
| COSM          | 0.88                        | [0.79-0.98] | 1.36                         | [1.32-1.41] |
| HPFS          | 0.88                        | [0.79-0.98] | 1.36                         | [1.32-1.41] |
| MCCS          | 0.91                        | [0.82-1.01] | 1.37                         | [1.33-1.41] |
| PHS           | 0.87                        | [0.79-0.97] | 1.35                         | [1.31-1.39] |
| PLCO          | 0.93                        | [0.84-1.03] | 1.35                         | [1.31-1.40] |
| USRT          | 0.92                        | [0.83-1.01] | 1.36                         | [1.30-1.40] |
| VITAL         | 0.90                        | [0.82-1.00] | 1.36                         | [1.32-1.40] |
| All studies   | 0.90                        | [0.82-1.00] | 1.36                         | [1.32-1.40] |

†Summary hazard ratios calculated using weighted-least squares meta-analysis.

\*No cancer or heart disease at baseline. AHS-1 Adventist Health Study 1. AHS – Agricultural Health Study.



Table 9: Estimated hazard ratios<sup>†</sup> (and 95% CI) for death from any cause according to BMI category: by smoking status

a) Female participants

| Smoking status          |                                            | BMI (kg/m <sup>2</sup> ) |                     |                     |           |                     |                     |                     |                     |                     |
|-------------------------|--------------------------------------------|--------------------------|---------------------|---------------------|-----------|---------------------|---------------------|---------------------|---------------------|---------------------|
|                         |                                            | 15-18.4                  | 18.5-19.9           | 20-22.4             | 22.5-24.9 | 25-27.4             | 27.5-29.9           | 30-34.9             | 35-39.9             | 40-49.9             |
| ASR                     | Never smokers                              | 368                      | 278                 | 249                 | 239       | 264                 | 281                 | 347                 | 450                 | 610                 |
| Adjusted HR<br>[95% CI] |                                            | 1.47<br>[1.33-1.62]      | 1.14<br>[1.07-1.22] | 1.00<br>[0.96-1.04] | 1.00<br>- | 1.09<br>[1.05-1.14] | 1.19<br>[1.14-1.24] | 1.44<br>[1.38-1.50] | 1.88<br>[1.77-2.00] | 2.51<br>[2.30-2.73] |
| ASR                     | Former smokers<br>(20+ yrs since quitting) | 364                      | 300                 | 231                 | 221       | 232                 | 265                 | 325                 | 415                 | 650                 |
| Adjusted HR<br>[95% CI] |                                            | 1.7<br>[1.39-2.07]       | 1.33<br>[1.17-1.50] | 1.04<br>[0.97-1.13] | 1.00<br>- | 1.09<br>[1.00-1.18] | 1.22<br>[1.11-1.34] | 1.51<br>[1.39-1.66] | 1.94<br>[1.70-2.21] | 2.9<br>[2.45-3.43]  |
| ASR                     | Former smokers<br>(<20 yrs since quitting) | 1245                     | 841                 | 691                 | 601       | 560                 | 766                 | 713                 | 911                 | 1468                |
| Adjusted HR<br>[95% CI] |                                            | 2.02<br>[1.70-2.39]      | 1.50<br>[1.32-1.71] | 1.26<br>[1.15-1.37] | 1.00<br>- | 1.00<br>[0.92-1.09] | 1.06<br>[0.96-1.17] | 1.17<br>[1.06-1.28] | 1.40<br>[1.23-1.60] | 1.75<br>[1.49-2.06] |
| ASR                     | Current smokers                            | 1086                     | 879                 | 741                 | 684       | 680                 | 763                 | 870                 | 976                 | 952                 |
| Adjusted HR<br>[95% CI] |                                            | 1.67<br>[1.54-1.81]      | 1.27<br>[1.20-1.35] | 1.05<br>[1.00-1.09] | 1.00<br>- | 1.04<br>[0.99-1.09] | 1.11<br>[1.04-1.18] | 1.26<br>[1.18-1.34] | 1.56<br>[1.41-1.73] | 1.77<br>[1.51-2.08] |

b) Male participants

| Smoking status          |                                            | BMI (kg/m <sup>2</sup> ) |                     |                     |           |                     |                     |                     |                     |                     |
|-------------------------|--------------------------------------------|--------------------------|---------------------|---------------------|-----------|---------------------|---------------------|---------------------|---------------------|---------------------|
|                         |                                            | 15-18.4                  | 18.5-19.9           | 20-22.4             | 22.5-24.9 | 25-27.4             | 27.5-29.9           | 30-34.9             | 35-39.9             | 40-49.9             |
| ASR                     |                                            | 638                      | 316                 | 325                 | 300       | 327                 | 369                 | 437                 | 570                 | 882                 |
| Adjusted HR<br>[95% CI] | Never smokers                              | 1.37<br>[1.09-1.71]      | 1.01<br>[0.85-1.20] | 1.00<br>[0.93-1.07] | 1.00<br>- | 1.06<br>[1.01-1.12] | 1.21<br>[1.14-1.28] | 1.44<br>[1.35-1.53] | 2.06<br>[1.85-2.28] | 2.93<br>[2.49-3.44] |
| ASR                     |                                            | 547                      | 375                 | 301                 | 307       | 300                 | 342                 | 381                 | 530                 | 962                 |
| Adjusted HR<br>[95% CI] | Former smokers<br>(20+ yrs since quitting) | 1.86<br>[1.11-3.09]      | 1.18<br>[0.84-1.66] | 0.98<br>[0.86-1.11] | 1.00<br>- | 0.97<br>[0.89-1.05] | 1.11<br>[1.01-1.21] | 1.27<br>[1.15-1.41] | 1.53<br>[1.27-1.83] | 2.58<br>[1.92-3.47] |
| ASR                     |                                            | 1381                     | 1356                | 914                 | 742       | 698                 | 725                 | 736                 | 919                 | 1132                |
| Adjusted HR<br>[95% CI] | Former smokers<br>(<20 yrs since quitting) | 2.36<br>[1.87-2.99]      | 1.97<br>[1.61-2.40] | 1.32<br>[1.19-1.46] | 1.00<br>- | 0.94<br>[0.88-1.01] | 0.87<br>[0.82-0.96] | 0.92<br>[0.84-0.99] | 1.12<br>[0.98-1.27] | 1.66<br>[1.34-2.06] |
| ASR                     |                                            | 2235                     | 1301                | 1094                | 956       | 957                 | 915                 | 1016                | 1116                | 1643                |
| Adjusted HR<br>[95% CI] | Current smokers                            | 2.30<br>[1.98-2.67]      | 1.37<br>[1.22-1.54] | 1.15<br>[1.08-1.23] | 1.00<br>- | 0.92<br>[0.87-0.97] | 1.00<br>[0.93-1.06] | 1.14<br>[1.06-1.22] | 1.26<br>[1.11-1.44] | 1.70<br>[1.36-2.11] |

†Hazard ratios calculated with age as the underlying time scale, stratified by study and adjusted for alcohol (g/day), education, marital status and overall physical activity. ASR- age-standardized rate, standardized using the US general population.

Figure 1: Estimated hazard ratios<sup>†</sup> (and 95% CI) for death from any cause according to BMI category (single units with BMI=24kg/m<sup>2</sup> as the reference category) in healthy\* never-smokers

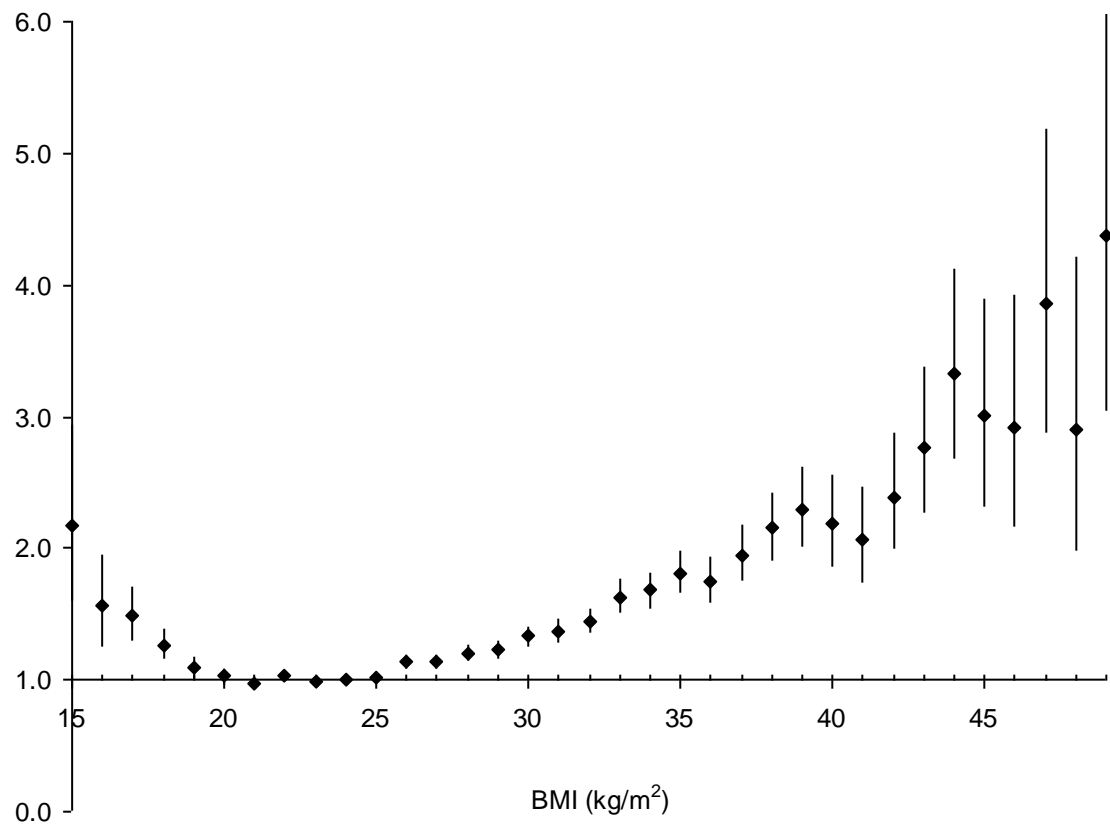

<sup>†</sup>Hazard ratios calculated with age as the underlying time scale, stratified by study and adjusted for gender, alcohol (g/day), education, marital status and overall physical activity. \*No cancer or heart disease at baseline.

Figure 2: Forest plot examining heterogeneity across cohorts by gender: estimated HR<sup>†</sup> for death from any cause per 5 unit increase in BMI in healthy never-smokers\*

a) Female participants

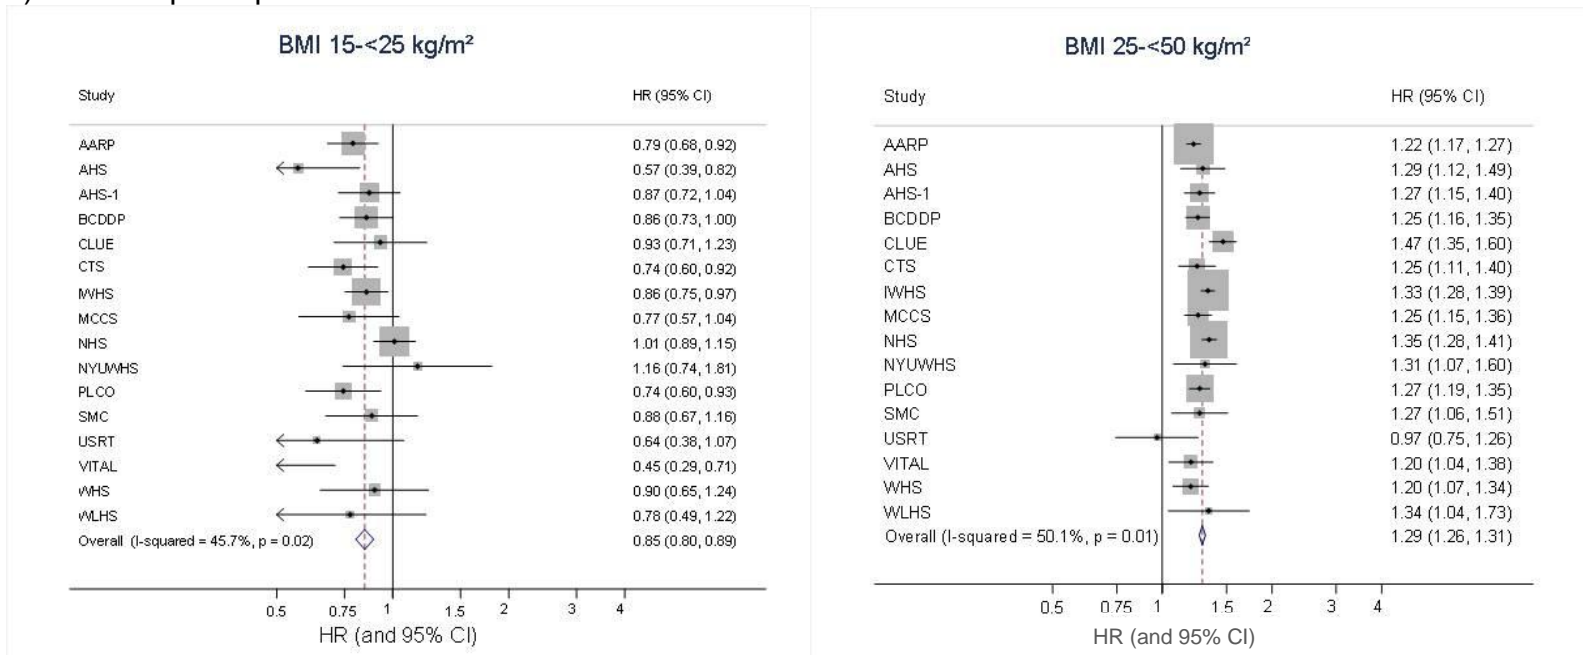

b) Male participants

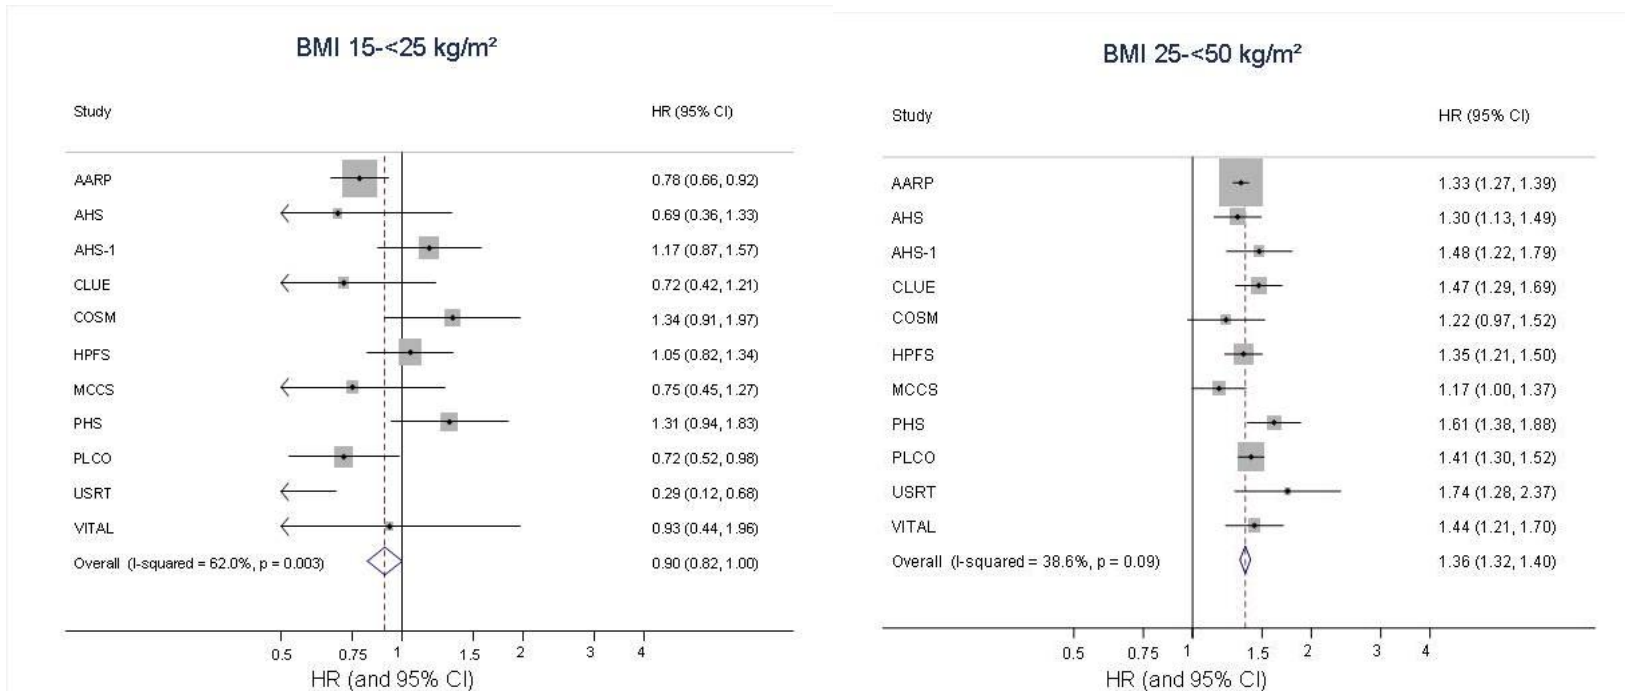

†Hazard ratios calculated with age as the underlying time scale, adjusted for alcohol (g/day), education, marital status and overall physical activity. \*No cancer or heart disease at baseline. AHS-1 Adventist Health Study 1. AHS – Agricultural Health Study.

All female subjects BMI 15-<25 I-squared=81% and p<0.001, BMI 25-<50 I-squared=81% p<0.001.

Healthy never-smoker females 5+ years follow-up BMI 15-<25 I-squared=40% p=0.05, BMI 25-<50 I-squared=24% p=0.18.

All male subjects BMI 15-<25 I-squared=87% and p<0.001, BMI 25-<50 I-squared=90% p<0.001.

Healthy never-smoker males 5+ years follow-up BMI 15-<25 I-squared=53% p=0.02, BMI 25-<50 I-squared=25% p=0.20.
